# Supplementary material for: Production of biohythane from cow dung using novel microbial synthetic consortia designed by heat-treated and acclimatized combined wastes
Source: Royal Society of Chemistry journal article supplement (doi:10.1039/d4va00107a), 2024-01-01
Supplement: d4va00107a2.xlsx [file d4va00107a2.xlsx]

## Sheet: (A)Bac_>1%_role
Production of biohythane from cow dung using novel microbial synthetic consortia designed by heat-treated and acclimatized combined wastes. Rashmi Ira1, Vikas Sharma1, Shrawan Kumar1, Mira Koul1, Lalita Sharma2, Aditi Halder2, Tulika Prakash1* 1 School of Biosciences and Bioengineering, Indian Institute of Technology, Mandi, Kamand, Mandi, Himachal Pradesh- 175005, India. 2 School of Chemical Sci…
Supplementary Table 2 (A) Table listing the roles and relative abundances of bacterial taxa. The bacterial members with a relative abundance of more than 1% are included in the analysis. The roles of the taxa in the three processes of AD namely, hydrolysis, acidogenesis, and acetogenesis are also indicated.
		Relative Abundance (%)
Phylum	Genus	CD_E(C2)Tx_SP	CD_E(C2)Tx_EP	CD_E(C2)Utx_SP	CD_E(C2)Utx_EP	CD_NC_SP	CD_NC_EP	Hydrolysis	Acidogenesis	Acetogenesis	Role of Genera in AD	References
Firmicutes	Acetivibrio	1.46	1.56	0	0.69	0	0	Hydrolysis (cellulose)	Acidogenesis	Acetogenesis	Cellulolytic, fermentative, and acetogenic genus hydrolyzes complex substrates into monomers.	[1],[2]
Firmicutes	Acholeplasma	0	0	3.58	0	0	0	Hydrolysis	Acidogenesis		A hydrolytic and fermentative group that utilizes oligosaccharides and produces acids, and might serve as an indicator group for the early detection of ammonia shock.	[2],[3]
Proteobacteria	Acinetobacter	2.01	1.32	1.96	0	0	0	Hydrolysis	Acidogenesis		Most members of this genus are pathogenic but are involved in hydrolysis, acidogenesis, and H2S removal. These are sulfide/sulfur-oxidizing bacteria (SOB), causing the VFAs accumulation and a decrease in biogas yield.	[4]-[6]			Hydrolytic
Proteobacteria	Aestuariicella	0	0	1.4	0	0	0			Aliphatic hydrocarbon-degrading	Some of the Aestuarriicella species play role in the degradation of aliphatic hydrocarbons.	[7]			Cellulolytic/Fibrolytic (cellulose, hemicellulose, lignocellulose)
Verrucomicrobiota	Akkermansia	0	0	1.31	0	0	2.42		Acidogenesis		Members of this genus are involved in the production of butyrate and propionate.	[8]			Acidogenenic
Bacteroidota	Alistipes	0	0	1.26	0	0	0		Acidogenesis	Acetogenesis	Members of the Alistipes genus belong to the intestinal population and are capable of producing propionate, acetate, and/or succinate as a fermentation end product.	[9],[10]			Acetogenic
Chloroflexi	Anaerolineaceae_UCG-001	0	0	0.28	0	0	1.39			Acetogenesis	These are acetate producers, involved in acetogenesis.	[2]			Sulfate & Thio-sulfate reducing
Firmicutes	Anaerovorax	1.46	1.41	0	0.37	0	0			Acetogenesis	Acetogenic bacteria utilize organic acids and carbohydrates to produce hydrogen and acetate.	[6],[5] .			Aliphatic hydrocarbon & Phenolic compounds degrader
Firmicutes	Aneurinibacillus	0	0	0	0	1.03	0	Hydrolysis	Acidogenesis		These are endospore-forming, hydrolytic, and fermentative bacteria.	[5],[6],[11]			Chlorinated contaminants
Actinobacteriota	Arthrobacter	0	0	1.24	0	0	0		Acidogenesis	Acetogenesis	For anaerobic growth, several Arthrobacter species used both nitrate ammonification and acetate, lactate, and ethanol-producing fermentation activities. They can degrade polymeric compounds and play important role in the degradation of agrochemicals and pollutants.	[12],[13]
Proteobacteria	Azospira	1.24	1.12	0	0	0	0		Acidogenesis	Denitrifying	These are acidogenic and denitrifying bacteria, able to accumulate polyhydroxy-butyrate storage granules and nitrogen fixation and biological phosphorus removal.	[14]-[16]
Bacteroidota	Bacteroidales_RF16_group	0	0	3.46	0	0	5.21		Acidogenesis		Fermentative bacteria degrades amino acids and carbohydrates.	[17]
Bacteroidota	Bacteroidales_UCG-001	1.02	1.26	0	0.52	0.58	0	Hydrolysis (Fibrolytic)	Acidogenesis	Acetogenesis	Fibrolytic bacteria associated with biohydrogenation of fatty acids in remun.	[18],[19]
Bacteroidota	Bacteroides	0.89	0.88	3.16	0	0	2.02	Hydrolysis	Acidogenesis		Hydrolytic, fermentative, and acetogenic bacteria break down the complex substrates into monomers and dimers, and further converted these into VFAs, short-chain fatty acids, and alcohols.	[1],[2],[5]
Bacteroidota	Bacteroidetes_vadinHA17	0.22	0.24	0	1.78	0	0			Acetogenesis	Acetogenic bacteria, utilize large carbohydrate molecules for the production of acids which favors the growth of methanogens. Members are involved in the degradation of protein, amino acids, phenols, and N-heterocyclic compounds.	[20],[17]
Proteobacteria	BD1-7_clade	0	0	1.57	0	0	0				The abundance and distribution of the clade are positively correlated with the utilization of different types of carbon sources such as carbohydrates, amino acids, amines, carboxylic acids, polymers, and others.	[21]
Proteobacteria	Brevundimonas	0	0	1.12	0	1.1	0		Acidogenesis		These are acidogenic hydrogen producers.	[22]
Firmicutes	c__Clostridia	1.18	1.18	0	0.23	0	0			Acetogenesis	Members of Clostridia are acetogenic or acetate-oxidizing bacteria that convert acetate into hydrogen and are involved in acetoclastic methanogenesis. Acetate-consuming microbes of class Clostridia carry the FTFHS gene coding for the formyltetrahydrofolate synthetase (a key enzyme of reductive acetogenesis). A few species are known as syntrophic acetate-oxidizers.	[2]
Nitrospirota	c__Thermodesulfovibrionia_uncultured	0	0.29	0	1.78	0	0			Sulfate-reducing	These are sulfate-reducing bacteria.	[23]
Firmicutes	Caldicoprobacter	0	0	0	0.14	1.13	0	Hydrolysis (fiber digestion)	Acidogenesis		Caldicoprobacter is an obligately anaerobic and thermophilic bacteria and has the ability to degrade cellulosic metabolites, cellobiose, glucose, galactose, raffinose, xylan, and xylose. It plays role in the hydrolytic breakdown of complex compounds to monosaccharides, acetate, CO2, and H2.	[24],[5]
Caldisericota	Caldisericum	0	0	0	0	0	4.04			Thiosulfate-reducing	Caldisericum is a thiosulfate-reducing anaerobic, thermophilic bacterium in which fermentation has not been observed, nor has its genetic potential been encoded.	[25]
Patescibacteria	Candidatus_Falkowbacteria	0	0	0	1.58	0	0			Sulfate-reducing	Members are putatively symbiotic bacteria and involved in putative sulphate reduction.	[26]
Firmicutes	Cellulosilyticum	5.51	5.17	0	0	0	0	Hydrolysis (Cellulolytic)			Cellulolytic bacterium.	[27]
Proteobacteria	Cellvibrio	0	0	1.57	0	0	0	Hydrolysis (Cellulolytic)	Acidogenesis		Cellulolytic bacterium, involved in degradation of polymeric substrates.	[28]
Firmicutes	Christensenellaceae_R-7_group	3.25	2.53	0.54	2.62	0	0		Acidogenesis		Acidogenic bacterial group.	[5]
Firmicutes	Clostridia_vadinBB60_group	1.59	1.7	0.68	0	1.34	0			Acetogenesis	These are syntrophic acetogenic bacteria involved in acetate oxidization by converting acetate into hydrogen.	[2]
Firmicutes	Clostridium_sensu_stricto_1	6.88	6.96	0	2.39	2.13	0	Hydrolysis (cellulose)	Acidogenesis	Acetogenesis	Spore-forming, cellulose-decomposing, hydrolytic, fermentative, and acetogenic bacteria with low doubling time. They have the characteristic property of mesophilic dark fermentation and are known for the highest H2 yielding. Most members of this group are pathogenic but are capable of converting various carbohydrates into acetate and succinate.	[5],[29]
Firmicutes	Clostridium_sensu_stricto_12	0	0	0	0	1.13	1.98	Hydrolysis (cellulose)	Acidogenesis	Acetogenesis	Spore-forming, cellulose-decomposing, hydrolytic, fermentative, and acetogenic bacteria with low doubling time. They have the characteristic property of mesophilic dark fermentation and are known for the highest H2 yielding. Most members of this group are pathogenic but are capable of converting various carbohydrates into acetate and succinate.	[5],[29]
Firmicutes	Clostridium_sensu_stricto_13	0	0	0.37	0	2.68	0	Hydrolysis (cellulose)	Acidogenesis	Acetogenesis	Spore-forming, cellulose-decomposing, hydrolytic, fermentative, and acetogenic bacteria with low doubling time. They have the characteristic property of mesophilic dark fermentation and are known for the highest H2 yielding. Most members of this group are pathogenic but are capable of converting various carbohydrates into acetate and succinate.	[5],[29]
Firmicutes	Clostridium_sensu_stricto_6	0.76	1.03	0	0	0	0	Hydrolysis (cellulose)	Acidogenesis	Acetogenesis	Spore-forming, cellulose-decomposing, hydrolytic, fermentative, and acetogenic bacteria with low doubling time. They have the characteristic property of mesophilic dark fermentation and are known for the highest H2 yielding. Most members of this group are pathogenic but are capable of converting various carbohydrates into acetate and succinate.	[5],[29]
Firmicutes	Clostridium_sensu_stricto_7	0	0	0	0	1.06	0	Hydrolysis (cellulose)	Acidogenesis	Acetogenesis	Spore-forming, cellulose-decomposing, hydrolytic, fermentative, and acetogenic bacteria with low doubling time. They have the characteristic property of mesophilic dark fermentation and are known for the highest H2 yielding. Most members of this group are pathogenic but are capable of converting various carbohydrates into acetate and succinate.	[5],[29]
Proteobacteria	Comamonas	0	0	1.5	0	0	0			Acetogenesis (nitrifying and denitrifying activity)	These are nitrifying and denitrifying bacteria involved in nitrogen removal and metabolism of various organic acids including acetate.	[30]
Actinobacteriota	Corynebacterium	0	0.41	2.22	0	0	0	Hydrolysis (cellulose)	Acidogenic	Acetogenic	Members of Corynebacterium are fastidious, slow-growing cellulolytic bacteria. These are capable of producing lysine, glutamic acid, and threonine. Under specific conditions, members of the Corynebacterium genus show fermentative metabolism of different carbohydrates to lactic acid.	[4],[5]
Proteobacteria	Dechlorobacter	0	0	1.43	0	0	0			Acetogenesis (Syntrophic)	Syntrohic acetogenic bacteria, which completely oxidize acetate with O2, ClO4−, ClO3−, Mn(IV), or NO3−as electron acceptors.	[31]
Proteobacteria	Devosia	0	0	1.64	0	0	0	Hydrolysis (lignocellulose)	Acidogenesis		Lignocellulolytic and fermentative bacteria.	[6],[32]
Bacteroidota	DMER64	1.43	0.79	0	0	0	0			Acetogenesis (Syntrophic)	These can form magnetite-mediated DIET with various methanogens and are known to be a potential syntrophic bacterial group.	[33]
Patescibacteria	Dojkabacteria	0	0	0	2.62	0.34	0	Hydrolysis	Acidogenesis		Carbohydrate degrading fermentative bacteria.	[34]
Bacteroidota	Dysgonomonadaceae	1.02	1.26	0	1.09	2.47	0	Hydrolysis	Acidogenesis		These are strict or facultative anaerobes capable of fermenting sugars into organic acids and can not serve in harsh conditions.	[35]-[37]
Proteobacteria	f__Alcaligenaceae	0	0	1.52	0	0	0			Phenolic compounds degradation	These are capable of degrading aromatic compounds and lignin-derived phenolic compounds.	[38]
Chloroflexi	f__Anaerolineaceae_uncultured	0	0	0	0.69	1.24	4.8			Acetogenesis	Members of the Anaerolieaceae family are non-hydrolytic acetogens (acetate producers).	[2]
Firmicutes	f__Caloramatoraceae_uncultured	0	0	0	0	0.69	1.66	Hydrolysis	Acidogenesis		Members of the Caloramatoraceae family are hydrolytic and fermentative bacteria.	[39]
Proteobacteria	f__Comamonadaceae	0	0	0.7	0	1.55	0			Acetogenesis (Syntrophic)	Members of the Comamonadaceae family degraders organic acid including acetate.	[30]
Bacteroidota	f__Dysgonomonadaceae_uncultured	0.1	0.94	0.35	1.01	1.06	0.72		Acidogenesis		Members of the Dysgonomonadaceae family are capable of fermenting a wide range of monosaccharides and disaccharides.	[40]
Firmicutes	f__Hungateiclostridiaceae_uncultured	0.35	0	0	1.01	0	0	Hydrolysis (Cellulolytic)	Acidogenesis		Members of the Hungateiclostridiaceae family are acidogenic and xylan degraders own cellulolytic activity and produce acetic acid and isopropanol as the main fermentation products.	[39]
Firmicutes	f__Lachnospiraceae	0	0	3.09	0	0	0	Hydrolysis (Fibrolytic)	Acidogenesis		Members of the Lachnospiraceae family are fibrolytic microbes that can persist on plant fibers and are capable of degrading complex plant compounds. And at the beginning of the start-up phase, they are likely to be responsible for an increase in hydrogen concentration.	[41]
Proteobacteria	f__Rhodobacteraceae	0	0	2.15	0	0	0			Sulfur bacteria	Rhodobacteraceae is a family of purple sulfur bacteria, which oxidize and utilizes hydrogen sulfide to elemental sulfur.	[42]
Proteobacteria	f__Rhodocyclaceae	0	0	0	0	0	1.44			Acetogenesis (denitrifying activity)	Members of the Rhodocyclaceae family are involved in denitrification and are able to reduce nitrate or nitrite.	[43]
Firmicutes	f__Ruminococcaceae_uncultured	1.43	1.53	0	1.58	0	0	Hydrolysis (Fibrolytic)	Acidogenesis		Members of the Ruminococcaceae family are hydrolytic, fermentative, and fibrolytic microorganisms with the ability to persist on plant fibers and degrade complex plant compounds and are likely to be responsible for an increase in H2 production at the beginning of the start-up phase.	[41]
Spirochaetota	f__Spirochaetaceae_uncultured	1.05	0	0	6.1	0.38	0	Hydrolysis (Fibrolytic)	Acidogenesis		Members of the Spirochaetaceae family are cellulolytic/fibrolytic and fermentative bacteria. utilize sugar to produce acetate, CO2, and H2.	[41]
Synergistota	f__Synergistaceae_uncultured	1.85	1.65	0	0.37	0	0		Acidogenesis		Members of the Synergistaceae family are fermentative bacteria, capable of degrading lactate-, alcohol-,carbohydrate- and amino-acid.	[44],[45]
Firmicutes	f__Syntrophomonadaceae_uncultured	0	0	0	0	0	1.53			Acetogenesis (Syntrophic)	Members of the Syntrophomonadaceae family are typical syntrophic fatty acid oxidizers (mainly butyate) in anoxic environments, and are well known for their long chain fatty acid β-oxidation properties.	[45]
Bacteroidota	Fermentimonas	0	0	1.75	0	0.55	0	Hydrolysis	Acidogenesis		Hydrolytic and fermentative bacteria.	[2]
Bacteroidota	Flavobacterium	0	0	2.46	0	0	0	Hydrolysis	Acidogenesis		Hydrolytic and fermentative bacteria involved in production of VFA, CO2 and H2, via carbohydrates, lipids and proteins fermentation producing enzymes for polysaccharides’ and proteoglycans’ cleavage.	[46],[47]
Firmicutes	Fonticella	0	0	0	0	2.13	0		Acidogenesis		Fermentative bacteria.	[48]
Firmicutes	Fusibacter	0	0	1.38	0	0	0			Sulfur and Thiosulfate-reducing	Sulfate and Thiosulfate reducing bacteria.	[49],[50]
Proteobacteria	Gemmobacter	0	0	1.22	0	0	0		Acidogenesis		Fermentative bacteria involved in conversion of large carbohydrates molecules into smaller ones and utilizes methylated amine.	[51]
Acidobacteriota	Geothrix	0	0	0	0	0	1.75		Acidogenesis		Geothrix fermentans are anaerobic chemoorganotrophs that can use iron oxides as well as other elements as electron acceptors, such as Mn (IV), fumarate, nitrate, and the humic acid analogue 2, 6 anthraquinone disulfonate, or can be grown fermentatively with intermediates from the Calvin or citric cycles. Some strains of Geothrix have the ability to utilise organic molecules such as lactate, propi…	[52]
Firmicutes	Gracilibacter	4.81	3.5	0	0	0.65	0	Hydrolysis	Acidogenesis		Hydrolytic and fermentative bacteria.	[5]
Firmicutes	Herbinix	2.39	2.97	1.73	1.7	1.72	0	Hydrolysis (cellulose)	Acidogenesis		Cellulose degrdaing, hydrolytic and fermentative bacteria.	[2],[5]
Firmicutes	HN-HF0106	2.68	2.64	0	2.19	3.67	0	Hydrolysis (cellulose)	Acidogenesis		Hydrolytic and fermentative bacteria, being able to utilize cellulose as a substrate for the production of Hydrogen and acetate.	[29]
Firmicutes	Hydrogenispora	0.51	0.53	0	0	1.79	0	Hydrolysis	Acidogenesis	Acetogenesis	Hydrolytic/ Fermentative and acetogenic bacteria.	[5],[53]
Firmicutes	Izemoplasmatales	0	0	0	0.17	1.44	0		Acidogenesi		Play role in utilization of simple sugars.	[54]
Firmicutes	Lactobacillus	0	0	0	0	0	3.82	Hydrolysis	Acidogenesis	Acetogenesis	Hydrolytic/fermentative bacteria and this genus have a part in the pathways that lead to acidogenesis and acetogenesis while present in consortia. By using the phosphoketolase route, they ferment hexose sugars to produce lactic acid, acetate/ethanol, and CO2 as the main byproducts. Through acidogenesis, lactobacilli are able to biosynthesise cofactors, purines, or pyrimidines.	[2],[4],[5]
Bacteroidota	Lentimicrobium	1.59	1.82	0	0	0.34	0	Hydrolysis	Acidogenesis		Hydrolytic and fermentative bacteria involved in production of VFA, CO2 and H2, via carbohydrates, lipids and proteins fermentation producing enzymes for polysaccharides’ and proteoglycans’ cleavage.	[47]
Chloroflexi	Leptolinea	0	0	0	0	0	12.08	Hydrolysis	Acidogenesis	Acetogenesis	Hydrolytic, acidogenic and acetate producing bacteria genus. Few species are capable of metabolising number of carbohydrates, and involved in degradation of extracellular polymers, which are the major components of activated sludge during anaerobic digestion.	[2],[30],[55]
Firmicutes	Leuconostoc	0	0	0	0	0	1.75		Acidogenesis		Acidogenic bacteria.	[56]
Chloroflexi	Longilinea	0	0	0	0.98	0.89	2.69			Acetogenesis (Syntrophic)	Syntrophic acetogenic bacteria involved in acetate production.	[2]
Bacteroidota	M2PB4-65_termite_group	1.66	2.35	0	0.26	0	0	Hydrolysis (cellulose, hemicellulose, lignocellulose)			Group of termite gut bacteria, capable of degrading up to 90% cellulose, ligning, hemicellulose, and lignocellulose compounds they ingest as food materials.	[57]
Bacteroidota	Meniscus	0.32	0.18	0	2.68	0	0	Hydrolysis	Acidogenesis		Hydrolytic/ Fermentative bacteria.	[58]
Chloroflexi	o__Dehalococcoidales_uncultured	0	0	0	1.27	0.31	0			detoxification of chlorinated contaminants	Members of order Dehalococcoides play significant role in detoxification of chlorinated contaminants.	[59]
Firmicutes	Oxobacter	0	0	0	0	4.02	1.08		Acidogenesis	Acetogenesis	Endospore-forming, acidogenic and acetogenic bacteria, involved in the synthesis of lactic acid.	[60]
Bacteroidota	Paludibacter	0	0	1.57	0	0	0	Hydrolysis	Acidogenesis		Hydrolytic/ Fermentative bacteria.	[6]
Firmicutes	Papillibacter	1.27	0.91	0	1.38	0	0			Acetogenesis	Acetogenic bacteria involved in degradation of aliphatic side chain to produce acetate.	[61]
Bacteroidota	Pedobacter	0	0	2.01	0	0	0	Hydrolysis (lignocellulose)			Bacterial genus play significant role in degradation of cellulose, hemicellulose, and lignocellulose.	[62]
Firmicutes	Pelospora	1.05	1.15	0	0	0	1.39		Acidogenesis		Endospore-forming, fermentative bacteria.	[63]
Bacteroidota	Prevotellaceae_UCG-003	0	0	1.68	0	0	0	Hydrolysis	Acidogenesis		Hydrolytic/ Fermentative bacteria.	[41]
Bacteroidota	Prevotellaceae_UCG-004	0	0	2.76	0	0	3.91	Hydrolysis	Acidogenesis		Hydrolytic/ Fermentative bacteria.	[41]
Campilobacterota	Pseudarcobacter	0	0	0	0	0	1.3			Sulfur-oxidizing or Sulfur-metabolizing bacteria	Pseudoarcobacter are sulfur-oxidizing or -metabolizing bacteria that combine denitrification activities under anaerobic conditions.	[64]
Proteobacteria	Pseudomonas	0	0	4.84	0	19.81	13.61	Hydrolysis (cellulose)	Acidogenesis		Pathogenic bacteria, and some spp. have multiple virulance factors. Pseudomonas spp. play role in hydrolysis, acidogenesis and effective degradation of cellulosic rich biowaste via producing highly active cellulases. Pseudomonas spp. utilise regulatory systems to selectively assimilate a preferred carbon source from mixtures, a process termed as carbon catabolite suppression, allowing free-living…	[4],[5],[65],[66]
Proteobacteria	Rahnella1	0	0	0	0	3.37	0.94	Hydrolysis (cellulose)	Acidogenesis		Fermentative bacteria and involved in effective degradation of cellulosic rich biowaste via producing highly active cellulases.	[67]
Proteobacteria	Rheinheimera	0	0	2.36	0	0	0		Fat degraders		Bacterial genus is capable of digesting fat, oil, and grease.	[68]
Bacteroidota	Rikenellaceae_RC9_gut_group	0	0	2.92	0	0	4.67		Acidogenesis		Acidogenic bacteria, involved in fermentation of carbohydrates or proteins.	[41]
Firmicutes	Romboutsia	1.62	1.38	0	0.49	0	0	Hydrolysis	Acidogenesis		Hydrolytic and fermentative bacteria. In consortia, bacterial genera influences the synthesis and degradation of growth metabolites in manure, as well as processes relevant to growth. Members of the genus have been found to play a role in carbohydrate utilisation (not necessarily cellulose and xylose), fermentation of single amino acids, metabolic end products, and anaerobic respiration. However,…	[4],[69],[70]
Firmicutes	Ruminiclostridium	1.27	1.88	0.87	2.01	0	0	Hydrolysis (cellulose)	Acidogenesis		Hydrolytic and fermentative bacteria involved in degradation of cellulose and lignocellulose.	[66]
Firmicutes	Ruminococcus	1.82	2.12	0	0.2	0	0	Hydrolysis (cellulose)	Acidogenesis		Cellulolytic/fibrolytic bacteria, involved in hydrolysis, fermentation, and acetogenesis.	[2],[5],[41]
Bacteroidota	Ruminofilibacter	1.37	1.35	0	0	2.06	0	Hydrolysis (lignocellulose)	Acidogenesis		Fermentative bacteria involved in degradation of lignocellulose.	[5]
SAR324_clade (Marine_group_B)	SAR324_clade(Marine_group_B)	1.78	1.56	0	3.31	0	0			Acetogenic	SAR324 clade members are sulfur oxidizing and mixotrophic bacteria as they are capable of carbon fixation, and utilization of heterotrophic carbon.	[71],[72]
Firmicutes	Sedimentibacter	3.03	2.12	1.54	1.38	0.86	0		Acidogenesis		Acidogenic bacteria.	[5]
Planctomycetota	SG8-4	1.11	0.94	0	0.12	0.34	0			Ammonium oxidation	Annamox bacteria, involved in anaerobic ammonium oxidation.
Proteobacteria	Shewanella	0	0	0	0	7.04	0.18	Hydrolysis	Acidogenesis	Acetogenesis	Hydrolytic/fermentative bacteria utilizes lactate to make acetate and electrons, which are then used to produce methane. Shewanella spp., known as Fe(III)-respiring bacteria that are beneficial for a variety of biotechnological applications, such as microbial fuel cells and the bioremediation of water and sediments contaminated with metals, organics, and radionuclides. They can couple the oxidati…	[73]-[75]
Desulfobacterota	Smithella	1.31	0.44	0	3.2	0	1.62			Acetogenesis (Syntrophic-H2 consumers)	Syntrophic acetogenic bacteria which produce H2 by converting propionate and/or butyrate into acetate, and shows syntrophic relation with hydrogenotrophic methanogens via interspecies hydrogen transfer.	[2],[30]
Spirochaetota	Sphaerochaeta	2.64	2.12	0	1.84	0.93	0		Acidogenesis		Acidogenic bacteria, being able to utilize sugars as a substrate for the production of acetate, CO2, and H2.	[2]
Firmicutes	Sporanaerobacter	0	0	0	0	2.09	0			Acetogenesis	Acetogenic bacteria.	[5],[76]
Firmicutes	Sporobacter	0	0	0	2.65	0	0		Acidogenesis	Acetogenesis	In consortia this bacterial genera play role in pathways directly related to acidogenesis and acetogenesis, and members are capable of using organic acids in acetates yielding metabolism.	[4],[77]
Bacteroidota	SR-FBR-L83	0	0	0	0	0	1.62				Bacterial group are observed to respire electron acceptors namely Fe(III) and nitrite.	[78]
Acidobacteriota	Subgroup_18	0.29	0	0	2.22	0	0	Hydrolysis (hemicellulose)	Acidogenesis		Acidogenic bacteria and involved in hemicellulose degradation.	[79]
Campilobacterota	Sulfurospirillum	0	0	1.38	0	0	0			Sulfate-reducing	Sulfurospirillum are free-living bacteria that can reduce sulphur, arsenate, or tetrachloroethane in diverse species. Several Sulfurospirillum species produced H2 during fermentation of pyruvate, which is the first evidence of Epsilonproteobacteria producing H2 during fermentation. S. multivorans and most other Sulfurospirillum spp. have four gene clusters, each encoding a [NiFe] hydrogenase. Two…	[51],[80],[81]
Desulfobacterota	Syntrophorhabdus	1.37	1.7	0	0.46	0	0			Acetogenesis	Acetogenic bacteria.	[5]
Desulfobacterota	Syntrophus	1.08	1.35	0	2.13	0	0			Acetogenesis (Syntrophic)	Syntrophic acetogenic bacteria involved in oxidation of butarate and long chain fatty acids (LCFA). This genus converts VFAs and the alcohols to acetates, H2, and carbonic anhydride.	[1],[2],[39]
Firmicutes	Tepidanaerobacter	0	0	0	0	2.27	0			Acetogenesis (Syntrophic)	Syntrophic acetogenic bacteria involved in alcohol- and lactate-degradation and acetae oxidation.	[82]
Firmicutes	Terrisporobacter	0.1	2.82	0	1.27	0	0	Cellulolytic bacteria	Acidogenesis	Acetogenesis	Typical cellulose-degrading and acid-producing bacteria involved in acidogenesis and acetogenesis step. Terrisporobacter can utilize digested hydrolysates such as fructose, glucose, maltose, xylose, and others to produce acetate and CO2 in anaerobic digestion.	[4],[29],[83]
Spirochaetota	Treponema	3.76	2.09	0	3.63	1.13	0.45	Hydrolysis (Fibrolytic)	Acidogenesis	Acetogenesis	Pathogenic bacteria but involve in hydrolysis, fermentation and acetogenesis process, and also capable to lignocellulosic degradation.	[4],[6],[41],[84]
Desulfobacterota	Trichlorobacter	1.43	1.62	0	0	0	0.54			Acetogenesis (Syntrophic)	Trichlorobacter, also known as Geobacter, is syntrophic bacteria and has potential to use acetate and reduce carbon dioxide to methane by directly transferring electrons to methanogens, such as Methanosaeta and Methanosarcina.	[85],[86]
Firmicutes	Turicibacter	0.19	0.35	0	0	1.17	0.81	Hydrolysis (cellulose)	Acidogenesis		Hydrolytic and fermentative bacteria. In consortia, bacterial genera influences the synthesis and degradation of growth metabolites in manure, as well as processes relevant to growth. These pathways are also directly connected to the decomposition of cellulose. Members of the genus have been found to play a role in fat metabolism, such as T. sanguinis, which may be crucial for host steroid and li…	[4],[87]-[89]
Firmicutes	UCG-005	0	0	1.68	0	0	3.1	Hydrolysis (cellulose)	Acidogenesis		Fiber-degrading bacteria.	[90]
Firmicutes	UCG-010	1.37	2.23	0	0	2.09	0	Hydrolysis (cellulose)	Acidogenesis		Cellulose-degrading microbiota involved in degradation of complex plant compounds.	[91]
Verrucomicrobiota	vadinBE97	0.86	1.15	0	0	0	0		Acidogenesis		Sugar-fermenting bacteria.	[41]
Verrucomicrobiota	WCHB1-41	3.15	3.47	0.77	0.49	0	1.08	Hydrolysis			Mucin degraders and convert tthem into short-chain fatty acids (SCFAs) which are further used by other resident bacteria and cells as per their nutrional requirements.	[92]
References:
1. Goswami R, Chattopadhyay P, Shome A, Banerjee SN, Chakraborty AK, Mathew AK, et al. An overview of physico-chemical mechanisms of biogas production by microbial communities: a step towards sustainable waste management. Vol. 6, 3 Biotech. Springer Nature; 2016. p. 72.
2. Lim JW, Park T, Tong YW, Yu Z. The microbiome driving anaerobic digestion and microbial analysis. In 2020 [cited 2020 Jan 1]. p. 161. Available from: http://dx.doi.org/10.1016/bs.aibe.2020.04.001
3. Sposob M, Moon HS, Lee D, Kim TH, Yun YM. Comprehensive analysis of the microbial communities and operational parameters of two full-scale anaerobic digestion plants treating food waste in South Korea: Seasonal variation and effect of ammonia. [Internet]. Vol. 398, Journal of Hazardous Materials. Elsevier; 2020 [cited 2020 May 20]. Available from: http://www.ncbi.nlm.nih.gov/pubmed/32512456
4. Ijoma GN, Nkuna R, Mutungwazi A, Rashama C, Matambo TS. Applying PICRUSt and 16S rRNA functional characterisation to predicting co-digestion strategies of various animal manures for biogas production. [Internet]. Vol. 11, Scientific Reports. Springer Nature; 2021 [cited 2021 Oct 7]. Available from: http://www.ncbi.nlm.nih.gov/pubmed/34620937
5. Xu RZ, Fang S, Zhang L, Huang W, Shao Q, Fang F, et al. Distribution patterns of functional microbial community in anaerobic digesters under different operational circumstances: A review. [Internet]. Vol. 341, Bioresource Technology. Elsevier; 2021 [cited 2021 Aug 21]. Available from: http://www.ncbi.nlm.nih.gov/pubmed/34454239
6. Harirchi S, Wainaina S, Sar T, Nojoumi SA, Parchami M, Parchami M, et al. Microbiological insights into anaerobic digestion for biogas, hydrogen or volatile fatty acids (VFAs): a review. Vol. 13, Bioengineered. Taylor & Francis Group (Informa); 2022. p. 652157.
7. Lo N, Kim KH, Baek K, Jia B, Jeon CO. Aestuariicella hydrocarbonica gen. nov., sp. nov., an aliphatic hydrocarbon-degrading bacterium isolated from a sea tidal flat. [Internet]. Vol. 65, International Journal Of Systematic And Evolutionary Microbiology. Microbiology Society; 2015 [cited 2015 Mar 20]. p. 193540. Available from: http://www.ncbi.nlm.nih.gov/pubmed/25795067
8. Maniar K, Moideen A, Bhattacharyya R, Banerjee D. Metformin exerts anti-obesity effect via gut microbiome modulation in prediabetics: A hypothesis. [Internet]. Vol. 104, Medical Hypotheses. Elsevier; 2017 [cited 2017 Jun 1]. p. 11720. Available from: http://www.ncbi.nlm.nih.gov/pubmed/28673568
9. Dowd SE, Callaway TR, Wolcott RD, Sun Y, McKeehan T, Hagevoort RG, et al. Evaluation of the bacterial diversity in the feces of cattle using 16S rDNA bacterial tag-encoded FLX amplicon pyrosequencing (bTEFAP). [Internet]. Vol. 8, BMC Microbiology. Springer Nature; 2008 [cited 2008 Jul 24]. Available from: http://www.ncbi.nlm.nih.gov/pubmed/18652685
10. Holman DB, Gzyl KE. A meta-analysis of the bovine gastrointestinal tract microbiota. [Internet]. Vol. 95, FEMS Microbiology Ecology. Oxford University Press; 2019 [cited 2019 Jun 1]. Available from: http://www.ncbi.nlm.nih.gov/pubmed/31116403
11. Kaur C, Selvakumar G, Ganeshamurthy AN. Exploring the Utility of Aneurinibacillus as anbsp;Bioinoculant for Sustainable Crop Production and Environmental Applications. In 2019 [cited 2019 Jan 1]. p. 13541. Available from: http://link.springer.com/content/pdf/10.1007/978-3-030-15175-1_7
12. Eschbach M, Mbitz H, Rompf A, Jahn D. Members of the genus Arthrobacter grow anaerobically using nitrate ammonification and fermentative processes: anaerobic adaptation of aerobic bacteria abundant in soil. [Internet]. Vol. 223, Pathogens and Disease. Oxford University Press; 2003 [cited 2003 Jun 27]. p. 22730. Available from: http://www.ncbi.nlm.nih.gov/pubmed/12829291
13. Sinha D, Banerjee S, Mandal S, Basu A, Banerjee A, Balachandran S, et al. Enhanced biogas production from Lantana camara via bioaugmentation of cellulolytic bacteria. [Internet]. Vol. 340, Bioresource Technology. Elsevier; 2021 [cited 2021 Jul 24]. Available from: http://www.ncbi.nlm.nih.gov/pubmed/34332446
14. Weiss S, Tauber M, Somitsch W, Meincke R, Mller H, Berg G, et al. Enhancement of biogas production by addition of hemicellulolytic bacteria immobilised on activated zeolite. [Internet]. Vol. 44, Water Research. Elsevier; 2009 [cited 2009 Nov 29]. p. 197080. Available from: http://www.ncbi.nlm.nih.gov/pubmed/20022352
15. Mikes MC, Moe WM. Genome Sequence of the Type Strain Azospira restricta SUA2 (DSM 18626). [Internet]. Vol. 10, Microbiology Resource Announcements. American Society for Microbiology; 2021 [cited 2021 May 6]. Available from: http://www.ncbi.nlm.nih.gov/pubmed/33958413
16. Zhang D, Fu X, Dai X, Chen Y, Dai L. A new biological process for short-chain fatty acid generation from waste activated sludge improved by Clostridiales enhancement. [Internet]. Vol. 23, Environmental Science and Pollution Research. Springer Nature; 2016 [cited 2016 Sep 15]. p. 2397282. Available from: http://www.ncbi.nlm.nih.gov/pubmed/27638799
17. Mei R, Nobu MK, Narihiro T, Liu WT. Metagenomic and Metatranscriptomic Analyses Revealed Uncultured Bacteroidales Populations as the Dominant Proteolytic Amino Acid Degraders in Anaerobic Digesters. [Internet]. Vol. 11, Frontiers in Microbiology. Frontiers Media S.A.; 2020 [cited 2020 Jan 1]. Available from: http://www.ncbi.nlm.nih.gov/pubmed/33193263
18. Henderson G, Cox F, Ganesh S, Jonker A, Young W, Collaborators GRC, et al. Rumen microbial community composition varies with diet and host, but a core microbiome is found across a wide geographical range. [Internet]. Vol. 5, Scientific Reports. Springer Nature; 2015 [cited 2015 Oct 9]. Available from: http://www.ncbi.nlm.nih.gov/pubmed/26449758
19. Castro-Carrera T, Toral PG, Frutos P, McEwan NR, Hervs G, Abecia L, et al. Rumen bacterial community evaluated by 454 pyrosequencing and terminal restriction fragment length polymorphism analyses in dairy sheep fed marine algae. [Internet]. Vol. 97, Journal of Dairy Science. American Dairy Science Association; 2014 [cited 2014 Jan 17]. p. 16619. Available from: http://www.ncbi.nlm.nih.gov/pub…
20. Fan Q, Fan X, Fu P, Sun Y, Li Y, Long S, et al. Microbial community evolution, interaction, and functional genes prediction during anaerobic digestion in the presence of refractory organics [Internet]. Vol. 10, Journal of Environmental Chemical Engineering. Elsevier; 2022 [cited 2022 Jun 1]. Available from: http://dx.doi.org/10.1016/j.jece.2022.107789
21. Hu X, Su H, Zhang P, Chen Z, Xu Y, Xu W, et al. Microbial community characteristics of the intestine and gills of medium-form populations of Sthenoteuthis oualaniensis in the South China Sea [Internet]. Vol. 9, Frontiers in Marine Science. Frontiers Media S.A.; 2022 [cited 2022 Aug 12]. Available from: https://www.frontiersin.org/articles/10.3389/fmars.2022.920536/full
22. Su H, Zhang T, Bao M, Jiang Y, Wang Y, Tan T. Genome Sequence of a Promising Hydrogen-Producing Facultative Anaerobic Bacterium, Brevundimonas naejangsanensis Strain B1. [Internet]. Vol. 2, Genome Announcements. American Society for Microbiology; 2014 [cited 2014 Jun 5]. Available from: http://www.ncbi.nlm.nih.gov/pubmed/24903872
23. Zhang T, Xiao X, Chen S, Zhao J, Chen Z, Feng J, et al. Active Anaerobic Archaeal Methanotrophs in Recently Emerged Cold Seeps of Northern South China Sea. [Internet]. Vol. 11, Frontiers in Microbiology. Frontiers Media S.A.; 2020 [cited 2020 Jan 1]. Available from: http://www.ncbi.nlm.nih.gov/pubmed/33391242
24. Yokoyama H, Wagner ID, Wiegel J. Caldicoprobacter oshimai gen. nov., sp. nov., an anaerobic, xylanolytic, extremely thermophilic bacterium isolated from sheep faeces, and proposal of Caldicoprobacteraceae fam. nov. [Internet]. Vol. 60, International Journal Of Systematic And Evolutionary Microbiology. Microbiology Society; 2009 [cited 2009 Jul 31]. p. 6771. Available from: http://www.ncbi.nlm…
25. Martinez MA, Woodcroft BJ, Espinoza JCI, Zayed AA, Singleton CM, Boyd JA, et al. Discovery and ecogenomic context of a global Caldiserica-related phylum active in thawing permafrost, Candidatus Cryosericota phylum nov., Ca. Cryosericia class nov., Ca. Cryosericales ord. nov., Ca. Cryosericaceae fam. nov., comprising the four species Cryosericum septentrionale gen. nov. sp. nov., Ca. C. hinesi…
26. Anantharaman K, Hausmann B, Jungbluth SP, Kantor RS, Lavy A, Warren LA, et al. Expanded diversity of microbial groups that shape the dissimilatory sulfur cycle. [Internet]. Vol. 12, The ISME Journal. Springer Nature; 2018 [cited 2018 Feb 21]. p. 171528. Available from: http://www.ncbi.nlm.nih.gov/pubmed/29467397
27. Cai S, Dong X. Cellulosilyticum ruminicola gen. nov., sp. nov., isolated from the rumen of yak, and reclassification of Clostridium lentocellum as Cellulosilyticum lentocellum comb. nov. [Internet]. Vol. 60, International Journal Of Systematic And Evolutionary Microbiology. Microbiology Society; 2009 [cited 2009 Aug 6]. p. 8459. Available from: http://www.ncbi.nlm.nih.gov/pubmed/19661493
28. Ranalli G, Zanardini E, Sorlini C. Biodeterioration Including Cultural Heritage. In 2009 [cited 2009 Jan 1]. p. 191205. Available from: http://dx.doi.org/10.1016/b978-012373944-5.00132-2
29. Liu Z, Huang J, Yao Y, Wang M, Li A. Effect of Pretreatment by Freeze Vacuum Drying on Solid-State Anaerobic Digestion of Corn Straw [Internet]. Vol. 8, Fermentation. Multidisciplinary Digital Institute (MDPI); 2022 [cited 2022 May 30]. Available from: https://www.mdpi.com/2311-5637/8/6/259/pdf
30. Zhang Q, Wang M, Ma X, Gao Q, Wang T, Shi X, et al. High variations of methanogenic microorganisms drive full-scale anaerobic digestion process. [Internet]. Vol. 126, Environment International. Elsevier; 2019 [cited 2019 Mar 7]. p. 54351. Available from: http://www.ncbi.nlm.nih.gov/pubmed/30852441
31. Thrash JC, Pollock J, Torok T, Coates JD. Description of the novel perchlorate-reducing bacteria Dechlorobacter hydrogenophilus gen. nov., sp. nov.and Propionivibrio militaris, sp. nov. [Internet]. Vol. 86, Applied Microbiology and Biotechnology. Springer Nature; 2010 [cited 2010 Mar 1]. p. 33543. Available from: http://www.ncbi.nlm.nih.gov/pubmed/19921177
32. Huang S, Sheng P, Zhang H. Isolation and identification of cellulolytic bacteria from the gut of Holotrichia parallela larvae (Coleoptera: Scarabaeidae). [Internet]. Vol. 13, International Journal of Molecular Sciences. Multidisciplinary Digital Institute (MDPI); 2012 [cited 2012 Jan 1]. p. 256377. Available from: http://www.ncbi.nlm.nih.gov/pubmed/22489111
33. Lee J, Koo T, Yulisa A, Hwang S. Magnetite as an enhancer in methanogenic degradation of volatile fatty acids under ammonia-stressed condition. [Internet]. Vol. 241, Journal of Environmental Management. Elsevier; 2019 [cited 2019 Apr 28]. p. 41826. Available from: http://www.ncbi.nlm.nih.gov/pubmed/31035235
34. Hosokawa S, Kuroda K, Narihiro T, Aoi Y, Ozaki N, Ohashi A, et al. Cometabolism of the Superphylum Patescibacteria with Anammox Bacteria in a Long-Term Freshwater Anammox Column Reactor [Internet]. Vol. 13, Water. Multidisciplinary Digital Institute (MDPI); 2021 [cited 2021 Jan 16]. Available from: https://www.mdpi.com/2073-4441/13/2/208/pdf
35. Shamurad B, Sallis P, Petropoulos E, Tabraiz S, Ospina C, Leary P, et al. Stable biogas production from single-stage anaerobic digestion of food waste [Internet]. Vol. 263, Applied Energy. Elsevier; 2020 [cited 2020 Apr 1]. Available from: http://dx.doi.org/10.1016/j.apenergy.2020.114609
36. Garca-Lpez M, Meier-Kolthoff JP, Tindall BJ, Gronow S, Woyke T, Kyrpides NC, et al. Analysis of 1,000 Type-Strain Genomes Improves Taxonomic Classification of Bacteroidetes. [Internet]. Vol. 10, Frontiers in Microbiology. Frontiers Media S.A.; 2019 [cited 2019 Jan 1]. Available from: http://www.ncbi.nlm.nih.gov/pubmed/31608019
37. Owusu-Agyeman I, Plaza E, Cetecioglu Z. Long-term alkaline volatile fatty acids production from waste streams: Impact of pH and dominance of Dysgonomonadaceae. [Internet]. Vol. 346, Bioresource Technology. Elsevier; 2021 [cited 2021 Dec 24]. Available from: http://www.ncbi.nlm.nih.gov/pubmed/34958905
38. Mohamad-Zainal NSL, Ramli N, Zolkefli N, Mustapha NA, Hassan MA, Maeda T. Survivability of Alcaligenaceae and Chromatiaceae as palm oil mill effluent pollution bioindicators under fluctuations of temperature, pH and total suspended solid. Vol. 132, Journal of Bioscience and Bioengineering. Elsevier; 2021. p. 17482.
39. Lu Y, Liu X, Miao Y, Chatzisymeon E, Pang L, Qi L, et al. Particle size effects in microbial characteristics in thermophilic anaerobic digestion of cattle manure containing copper oxide. [Internet]. Environmental Science and Pollution Research. Springer Nature; 2022 [cited 2022 Apr 21]. Available from: http://www.ncbi.nlm.nih.gov/pubmed/35449326
40. Tomazetto G, Hahnke S, Wibberg D, Phler A, Klocke M, Schlter A. Proteiniphilum saccharofermentans str. M3/6T isolated from a laboratory biogas reactor is versatile in polysaccharide and oligopeptide utilization as deduced from genome-based metabolic reconstructions. [Internet]. Vol. 18, Biotechnology Reports. Elsevier; 2018 [cited 2018 Apr 30]. Available from: http://www.ncbi.nlm.nih.gov/pubm…
41. Baniel A, Amato KR, Beehner JC, Bergman TJ, Mercer A, Perlman RF, et al. Seasonal shifts in the gut microbiome indicate plastic responses to diet in wild geladas. [Internet]. Vol. 9, Microbiome. Springer Nature; 2021 [cited 2021 Jan 23]. Available from: http://www.ncbi.nlm.nih.gov/pubmed/33485388
42. Mirmohamadsadeghi S, Karimi K, Azarbaijani R, Yeganeh LP, Angelidaki I, Nizami AS, et al. Pretreatment of lignocelluloses for enhanced biogas production: A review on influencing mechanisms and the importance of microbial diversity [Internet]. Vol. 135, Renewable and Sustainable Energy Reviews. Elsevier; 2021 [cited 2021 Jan 1]. Available from: http://dx.doi.org/10.1016/j.rser.2020.110173
43. Oren A. The Family Rhodocyclaceae. In 2014 [cited 2014 Jan 1]. p. 97598. Available from: http://link.springer.com/content/pdf/10.1007/978-3-642-30197-1_292
44. Nakasaki K, Nguyen KK, Ballesteros FC, Maekawa T, Koyama M. Characterizing the microbial community involved in anaerobic digestion of lipid-rich wastewater to produce methane gas. [Internet]. Vol. 61, Anaerobe. Elsevier; 2019 [cited 2019 Jul 30]. Available from: http://www.ncbi.nlm.nih.gov/pubmed/31374328
45. He J, Wang X, Yin XB, Li Q, Li X, Zhang YF, et al. Insights into biomethane production and microbial community succession during semi-continuous anaerobic digestion of waste cooking oil under different organic loading rates. Vol. 8, AMB Express. Springer Nature; 2018. p. 92.
46. Shah FA, Mahmood Q, Shah MM, Pervez A, Asad SA. Microbial ecology of anaerobic digesters: the key players of anaerobiosis. [Internet]. Vol. 2014, The Scientific World JOURNAL. Hindawi Publishing Corporation; 2014 [cited 2014 Jan 1]. Available from: http://www.ncbi.nlm.nih.gov/pubmed/24701142
47. Zhang J, Mao L, Zhang L, Loh KC, Dai Y, Tong YW. Metagenomic insight into the microbial networks and metabolic mechanism in anaerobic digesters for food waste by incorporating activated carbon. [Internet]. Vol. 7, Scientific Reports. Springer Nature; 2017 [cited 2017 Sep 12]. Available from: http://www.ncbi.nlm.nih.gov/pubmed/28900280
48. Fraj B, Hania WB, Postec A, Hamdi M, Ollivier B, Fardeau ML. Fonticella tunisiensis gen. nov., sp. nov., isolated from a hot spring. [Internet]. Vol. 63, International Journal Of Systematic And Evolutionary Microbiology. Microbiology Society; 2012 [cited 2012 Sep 28]. p. 194750. Available from: http://www.ncbi.nlm.nih.gov/pubmed/23024143
49. Hania WB, Fraj B, Postec A, Fadhlaoui K, Hamdi M, Ollivier B, et al. Fusibacter tunisiensis sp. nov., isolated from an anaerobic reactor used to treat olive-mill wastewater. [Internet]. Vol. 62, International Journal Of Systematic And Evolutionary Microbiology. Microbiology Society; 2011 [cited 2011 Aug 5]. p. 13658. Available from: http://www.ncbi.nlm.nih.gov/pubmed/21828014
50. Qiu D, Zeng X, Zeng L, Li G, Shao Z. Fusibacter ferrireducens sp. nov., an anaerobic, Fe()- and sulphur-reducing bacterium isolated from mangrove sediment. [Internet]. Vol. 71, International Journal Of Systematic And Evolutionary Microbiology. Microbiology Society; 2021 [cited 2021 Nov 1]. Available from: http://www.ncbi.nlm.nih.gov/pubmed/34739363
51. Zhang Y, Sun R, Varrone C, Wei Y, Shyryn A, Zhou A, et al. Enhanced Acetogenesis of Waste Activated Sludge by Conditioning with Processed Organic Wastes in Co-Fermentation: Kinetics, Performance and Microbial Response [Internet]. Vol. 13, Energies. Multidisciplinary Digital Institute (MDPI); 2020 [cited 2020 Jul 14]. Available from: https://www.mdpi.com/1996-1073/13/14/3630/pdf
52. Nevin KP, Lovley DR. Mechanisms for accessing insoluble Fe(III) oxide during dissimilatory Fe(III) reduction by Geothrix fermentans. [Internet]. Vol. 68, Applied and Environmental Microbiology. American Society for Microbiology; 2002 [cited 2002 May 1]. p. 22949. Available from: http://www.ncbi.nlm.nih.gov/pubmed/11976100
53. Prem EM, Markt R, Lackner N, Illmer P, Wagner AO. Microbial and Phenyl Acid Dynamics during the Start-up Phase of Anaerobic Straw Degradation in Meso- and Thermophilic Batch Reactors. [Internet]. Vol. 7, Microorganisms. Multidisciplinary Digital Institute (MDPI); 2019 [cited 2019 Dec 5]. Available from: http://www.ncbi.nlm.nih.gov/pubmed/31817383
54. Trutschel LR, Chadwick GL, Kruger B, Blank JG, Brazelton WJ, Dart ER, et al. Investigation of microbial metabolisms in an extremely high pH marine-like terrestrial serpentinizing system: Ney Springs. [Internet]. Vol. 836, The Science of The Total Environment. Elsevier; 2022 [cited 2022 Apr 25]. Available from: http://www.ncbi.nlm.nih.gov/pubmed/35476949
55. Yamada T, Sekiguchi Y, Hanada S, Imachi H, Ohashi A, Harada H, et al. Anaerolinea thermolimosa sp. nov., Levilinea saccharolytica gen. nov., sp. nov. and Leptolinea tardivitalis gen. nov., sp. nov., novel filamentous anaerobes, and description of the new classes Anaerolineae classis nov. and Caldilineae classis nov. in the bacterial phylum Chloroflexi. [Internet]. Vol. 56, International Journ…
56. Yan M, Wang BH, Xu X, Meister T der, Taba HT, Hwang FF, et al. Extrusion of Dissolved Oxygen by Exopolysaccharide From Leuconostoc mesenteroides and Its Implications in Relief of the Oxygen Stress. [Internet]. Vol. 9, Frontiers in Microbiology. Frontiers Media S.A.; 2018 [cited 2018 Jan 1]. Available from: http://www.ncbi.nlm.nih.gov/pubmed/30405549
57. Tsegaye B, Balomajumder C, Roy P. Isolation and Characterization of Novel Lignolytic, Cellulolytic, and Hemicellulolytic Bacteria from Wood-Feeding Termite Cryptotermes brevis. [Internet]. Vol. 22, International Microbiology. Springer Nature; 2018 [cited 2018 Jul 19]. p. 2939. Available from: http://www.ncbi.nlm.nih.gov/pubmed/30810928
58. Zhao Q, He S, Li L, Sun Y, Ren H. Links between Process Performance and Microbial Community of Pennisetum Hybrid Co-Digested with Municipal Solid Waste [Internet]. Vol. 14, Energies. Multidisciplinary Digital Institute (MDPI); 2021 [cited 2021 Jun 19]. Available from: https://www.mdpi.com/1996-1073/14/12/3651/pdf
59. Amos BK, Ritalahti KM, Cruz-Garcia C, Padilla-Crespo E, Lffler FE. Oxygen effect on Dehalococcoides viability and biomarker quantification. [Internet]. Vol. 42, Environmental Science & Technology. American Chemical Society (ACS); 2008 [cited 2008 Aug 1]. p. 571826. Available from: http://www.ncbi.nlm.nih.gov/pubmed/18754499
60. Bengelsdorf FR, Poehlein A, Schiel-Bengelsdorf B, Daniel R, Drre P. Genome Sequence of the Acetogenic Bacterium Oxobacter pfennigii DSM 3222T. [Internet]. Vol. 3, Genome Announcements. American Society for Microbiology; 2015 [cited 2015 Dec 3]. Available from: http://www.ncbi.nlm.nih.gov/pubmed/26634756
61. Defnoun S, Labat M, Ambrosio M, Garcia JL, Patel BK. Papillibacter cinnamivorans gen. nov., sp. nov., a cinnamate-transforming bacterium from a shea cake digester. [Internet]. Vol. 50 Pt 3, International Journal Of Systematic And Evolutionary Microbiology. Microbiology Society; 2000 [cited 2000 May 1]. p. 12218. Available from: http://www.ncbi.nlm.nih.gov/pubmed/10843066
62. Lpez-Mondjar R, Zhlke D, Becher D, Riedel K, Baldrian P. Cellulose and hemicellulose decomposition by forest soil bacteria proceeds by the action of structurally variable enzymatic systems. [Internet]. Vol. 6, Scientific Reports. Springer Nature; 2016 [cited 2016 Apr 29]. Available from: http://www.ncbi.nlm.nih.gov/pubmed/27125755
63. Matthies C, Springer N, Ludwig W, Schink B. Pelospora glutarica gen. nov., sp. nov., a glutarate-fermenting, strictly anaerobic, spore-forming bacterium. Vol. 50 Pt 2, International Journal Of Systematic And Evolutionary Microbiology. Microbiology Society; 2000. p. 6458.
64. Naphtali J, Chan AWY, Saleem F, Li E, Devries J, Schellhorn HE. Comparative Metagenomics of Anaerobic Digester Communities Reveals Sulfidogenic and Methanogenic Microbial Subgroups in Conventional and Plug Flow Residential Septic Tank Systems [Internet]. Vol. 10, Processes. Multidisciplinary Digital Institute (MDPI); 2022 [cited 2022 Feb 22]. Available from: https://www.mdpi.com/2227-9717/10/…
65. Panayidou S, Georgiades K, Christofi T, Tamana S, Promponas VJ, Apidianakis Y. Pseudomonas aeruginosa core metabolism exerts a widespread growth-independent control on virulence. [Internet]. Vol. 10, Scientific Reports. Springer Nature; 2020 [cited 2020 Jun 11]. Available from: http://www.ncbi.nlm.nih.gov/pubmed/32528034
66. Poulsen JS, Jonge N de, Macdo WV, Dalby FR, Feilberg A, Nielsen JL. Characterisation of cellulose-degrading organisms in an anaerobic digester. [Internet]. Vol. 351, Bioresource Technology. Elsevier; 2022 [cited 2022 Mar 2]. Available from: http://www.ncbi.nlm.nih.gov/pubmed/35247567
67. Usmani Z, Sharma M, Awasthi AK, Sivakumar N, Lukk T, Pecoraro L, et al. Bioprocessing of waste biomass for sustainable product development and minimizing environmental impact. [Internet]. Vol. 322, Bioresource Technology. Elsevier; 2020 [cited 2020 Dec 16]. Available from: http://www.ncbi.nlm.nih.gov/pubmed/33380376
68. Cavaleiro AJ, Pereira MA, Guedes AP, Stams AJM, Alves MM, Sousa DZ. Conversion of Cn-Unsaturated into Cn-2-Saturated LCFA Can Occur Uncoupled from Methanogenesis in Anaerobic Bioreactors. [Internet]. Vol. 50, Environmental Science & Technology. American Chemical Society (ACS); 2016 [cited 2016 Feb 25]. p. 308290. Available from: http://www.ncbi.nlm.nih.gov/pubmed/26810160
69. Wang Y, Song J, Zhai Y, Zhang C, Gerritsen J, Wang H, et al. Romboutsia sedimentorum sp. nov., isolated from an alkaline-saline lake sediment and emended description of the genus Romboutsia. [Internet]. Vol. 65, International Journal Of Systematic And Evolutionary Microbiology. Microbiology Society; 2015 [cited 2015 Jan 21]. p. 11938. Available from: http://www.ncbi.nlm.nih.gov/pubmed/25609678
70. Gerritsen J, Fuentes S, Grievink W, Niftrik L van, Tindall BJ, Timmerman HM, et al. Characterization of Romboutsia ilealis gen. nov., sp. nov., isolated from the gastro-intestinal tract of a rat, and proposal for the reclassification of five closely related members of the genus Clostridium into the genera Romboutsia gen. nov., Intestinibacter gen. nov., Terrisporobacter gen. nov. and Asacchar…
71. Cao H, Dong C, Bougouffa S, Li J, Zhang W, Shao Z, et al. Delta-proteobacterial SAR324 group in hydrothermal plumes on the South Mid-Atlantic Ridge. [Internet]. Vol. 6, Scientific Reports. Springer Nature; 2016 [cited 2016 Mar 8]. Available from: http://www.ncbi.nlm.nih.gov/pubmed/26953077
72. Boeuf D, Eppley JM, Mende DR, Malmstrom RR, Woyke T, DeLong EF. Metapangenomics reveals depth-dependent shifts in metabolic potential for the ubiquitous marine bacterial SAR324 lineage. Vol. 9, Microbiome. Springer Nature; 2021. p. 172.
73. Xiao L, Liu F, Lichtfouse E, Zhang P, Feng D, Li F. Methane production by acetate dismutation stimulated by Shewanella oneidensis and carbon materials: An alternative to classical CO2 reduction. Vol. 389, Biochemical Engineering Journal. Elsevier; 2020. p. 124469.
74. Tang YJ, Meadows AL, Keasling JD. A kinetic model describing Shewanella oneidensis MR-1 growth, substrate consumption, and product secretion. [Internet]. Vol. 96, Biotechnology and Bioengineering. Wiley; 2007 [cited 2007 Jan 1]. p. 12533. Available from: http://www.ncbi.nlm.nih.gov/pubmed/16865732
75. Canstein H von, Ogawa J, Shimizu S, Lloyd JR. Secretion of flavins by Shewanella species and their role in extracellular electron transfer. [Internet]. Vol. 74, Applied and Environmental Microbiology. American Society for Microbiology; 2007 [cited 2007 Dec 7]. p. 61523. Available from: http://www.ncbi.nlm.nih.gov/pubmed/18065612
76. Pervin HM, Batstone DJ, Bond PL. Previously unclassified bacteria dominate during thermophilic and mesophilic anaerobic pre-treatment of primary sludge. [Internet]. Vol. 36, Systematic and Applied Microbiology. Elsevier; 2013 [cited 2013 May 1]. p. 28190. Available from: http://www.ncbi.nlm.nih.gov/pubmed/23643091
77. Donnell MMO, Harris HMB, Jeffery IB, Claesson MJ, Younge B, Toole PWO, et al. The core faecal bacterial microbiome of Irish Thoroughbred racehorses. [Internet]. Vol. 57, Letters in Applied Microbiology. Wiley; 2013 [cited 2013 Aug 19]. p. 492501. Available from: http://www.ncbi.nlm.nih.gov/pubmed/23889584
78. Thieringer PH, Honeyman AS, Spear JR. Spatial and Temporal Constraints on the Composition of Microbial Communities in Subsurface Boreholes of the Edgar Experimental Mine. Vol. 9, Microbiology Spectrum. American Society for Microbiology; 2021. p. e0063121.
79. Chaves MG de, Silva GGZ, Rossetto R, Edwards RA, Tsai SM, Navarrete AA. Acidobacteria Subgroups and Their Metabolic Potential for Carbon Degradation in Sugarcane Soil Amended With Vinasse and Nitrogen Fertilizers. [Internet]. Vol. 10, Frontiers in Microbiology. Frontiers Media S.A.; 2019 [cited 2019 Jan 1]. Available from: http://www.ncbi.nlm.nih.gov/pubmed/31417506
80. Kruse S, Goris T, Westermann M, Adrian L, Diekert G. Hydrogen production by Sulfurospirillum species enables syntrophic interactions of Epsilonproteobacteria. [Internet]. Vol. 9, Nature Communications. Springer Nature; 2018 [cited 2018 Nov 19]. Available from: http://www.ncbi.nlm.nih.gov/pubmed/30451902
81. Huo L, Yang Y, Lv Y, Li X, Lffler FE, Yan J. Complete Genome Sequence of Sulfurospirillum Strain ACSTCE, a Tetrachloroethene-Respiring Anaerobe Isolated from Contaminated Soil. [Internet]. Vol. 9, Microbiology Resource Announcements. American Society for Microbiology; 2020 [cited 2020 Oct 1]. Available from: http://www.ncbi.nlm.nih.gov/pubmed/33004458
82. Prem EM, Stres B, Illmer P, Wagner AO. Microbial community dynamics in mesophilic and thermophilic batch reactors under methanogenic, phenyl acid-forming conditions. [Internet]. Vol. 13, Biotechnology for Biofuels and Bioproducts. Springer Nature; 2020 [cited 2020 Jan 1]. Available from: http://www.ncbi.nlm.nih.gov/pubmed/32391081
83. Deng Y, Guo X, Wang Y, He M, Ma K, Wang H, et al. Terrisporobacter petrolearius sp. nov., isolated from an oilfield petroleum reservoir. Vol. 65, International Journal Of Systematic And Evolutionary Microbiology. Microbiology Society; 2015. p. 35226.
84. Mamuad LL, Seo BJ, Faruk MSA, Espiritu HM, Jin SJ, Kim WI, et al. Treponema spp., the dominant pathogen in the lesion of bovine digital dermatitis and its characterization in dairy cattle. [Internet]. Vol. 245, Veterinary Microbiology. Elsevier; 2020 [cited 2020 Apr 25]. Available from: http://www.ncbi.nlm.nih.gov/pubmed/32456812
85. Snoeyenbos-West O, Praagh CGV, Lovley DR. Trichlorobacter thiogenes should be renamed as a Geobacter species. [Internet]. Vol. 67, Applied and Environmental Microbiology. American Society for Microbiology; 2001 [cited 2001 Feb 1]. p. 10202. Available from: http://www.ncbi.nlm.nih.gov/pubmed/11270361
86. Wang Z, Wang T, Si B, Watson J, Zhang Y. Accelerating anaerobic digestion for methane production: Potential role of direct interspecies electron transfer. Vol. 145, Renewable and Sustainable Energy Reviews. Elsevier; 2021. p. 111069.
87. Dimova LG, Zlatkov N, Verkade HJ, Uhlin BE, Tietge UJF. High-cholesterol diet does not alter gut microbiota composition in mice. [Internet]. Vol. 14, Nutrition & Metabolism. Springer Nature; 2017 [cited 2017 Jan 1]. Available from: http://www.ncbi.nlm.nih.gov/pubmed/28239402
88. Hoffman JM, Margolis KG. Building community in the gut: a role for mucosal serotonin. [Internet]. Vol. 17, Nature Reviews Gastroenterology & Hepatology. Springer Nature; 2020 [cited 2020 Jan 1]. p. 68. Available from: http://www.ncbi.nlm.nih.gov/pubmed/31624372
89. Zhou W, Xu H, Zhan L, Lu X, Zhang L. Dynamic Development of Fecal Microbiome During the Progression of Diabetes Mellitus in Zucker Diabetic Fatty Rats. [Internet]. Vol. 10, Frontiers in Microbiology. Frontiers Media S.A.; 2019 [cited 2019 Jan 1]. Available from: http://www.ncbi.nlm.nih.gov/pubmed/30837966
90. Li H, Ma L, Li Z, Yin J, Tan B, Chen J, et al. Evolution of the Gut Microbiota and Its Fermentation Characteristics of Ningxiang Pigs at the Young Stage. Vol. 11, Animals. Multidisciplinary Digital Institute (MDPI); 2021.
91. Guo B, Li D, Zhou B, Jiang Y, Bai H, Zhang Y, et al. Comparative characterization of bacterial communities in geese consuming of different proportions of ryegrass. [Internet]. Vol. 14, PLoS ONE. Public Library of Science; 2019 [cited 2019 Jan 1]. Available from: http://www.ncbi.nlm.nih.gov/pubmed/31652267
92. Guo N, Wu Q, Shi F, Niu J, Zhang T, Degen AA, et al. Seasonal dynamics of diet-gut microbiota interaction in adaptation of yaks to life at high altitude. [Internet]. Vol. 7, Npj Biofilms and Microbiomes. Springer Nature; 2021 [cited 2021 Apr 20]. Available from: http://www.ncbi.nlm.nih.gov/pubmed/33879801
93. Qi YL, Evans PN, Li YX, Rao YZ, Qu YN, Tan S, et al. Comparative Genomics Reveals Thermal Adaptation and a High Metabolic Diversity in Candidatus Bathyarchaeia. [Internet]. Vol. 6, MSystems. American Society for Microbiology; 2021 [cited 2021 Jul 20]. Available from: http://www.ncbi.nlm.nih.gov/pubmed/34282939
94. Chellapandi P, Bharathi M, Sangavai C, Prathiviraj R. Methanobacterium formicicum as a target rumen methanogen for the development of new methane mitigation interventions: A review. [Internet]. Vol. 6, Veterinary and Animal Science. Elsevier; 2018 [cited 2018 Sep 13]. p. 8694. Available from: http://www.ncbi.nlm.nih.gov/pubmed/32734058
95. Iltchenco J, Peruzzo V, Magrini FE, Marconatto L, Torres AP, Beal LL, et al. Microbiota profile in mesophilic biodigestion of sugarcane vinasse in batch reactors. [Internet]. Vol. 84, Water Science & Technology. IWA Publishing; 2021 [cited 2021 Oct 1]. p. 202839. Available from: http://www.ncbi.nlm.nih.gov/pubmed/34695028
96. Burkhardt M, Jordan I, Heinrich S, Behrens J, Ziesche A, Busch G. Long term and demand-oriented biocatalytic synthesis of highly concentrated methane in a trickle bed reactor [Internet]. Vol. 240, Applied Energy. Elsevier; 2019 [cited 2019 Apr 1]. p. 81826. Available from: http://dx.doi.org/10.1016/j.apenergy.2019.02.076
97. Li A, Chu Y, Wang X, Ren L, Yu J, Liu X, et al. A pyrosequencing-based metagenomic study of methane-producing microbial community in solid-state biogas reactor. [Internet]. Vol. 6, Biotechnology for Biofuels and Bioproducts. Springer Nature; 2013 [cited 2013 Jan 15]. Available from: http://www.ncbi.nlm.nih.gov/pubmed/23320936
98. Liu Y, Whitman WB. Metabolic, phylogenetic, and ecological diversity of the methanogenic archaea. [Internet]. Vol. 1125, Annals of the New York Academy of Sciences. Wiley; 2008 [cited 2008 Mar 1]. p. 17189. Available from: http://www.ncbi.nlm.nih.gov/pubmed/18378594
99. Thummes K, Kmpfer P, Jckel U. Temporal change of composition and potential activity of the thermophilic archaeal community during the composting of organic material. [Internet]. Vol. 30, Systematic and Applied Microbiology. Elsevier; 2007 [cited 2007 Mar 2]. p. 41829. Available from: http://www.ncbi.nlm.nih.gov/pubmed/17336478
100. Lerm S, Kleybcker A, Miethling-Graff R, Alawi M, Kasina M, Liebrich M, et al. Archaeal community composition affects the function of anaerobic co-digesters in response to organic overload. [Internet]. Vol. 32, Waste Management. Elsevier; 2011 [cited 2011 Dec 20]. p. 38999. Available from: http://www.ncbi.nlm.nih.gov/pubmed/22192420
101. Habtewold J, Gordon R, Sokolov V, VanderZaag A, Wagner-Riddle C, Dunfield K. Reduction in Methane Emissions From Acidified Dairy Slurry Is Related to Inhibition of Methanosarcina Species. [Internet]. Vol. 9, Frontiers in Microbiology. Frontiers Media S.A.; 2018 [cited 2018 Jan 1]. p. 2806. Available from: http://www.ncbi.nlm.nih.gov/pubmed/30515146
102. Yin DM, Westerholm M, Qiao W, Bi SJ, Wandera SM, Fan R, et al. An explanation of the methanogenic pathway for methane production in anaerobic digestion of nitrogen-rich materials under mesophilic and thermophilic conditions. [Internet]. Vol. 264, Bioresource Technology. Elsevier; 2018 [cited 2018 May 18]. p. 4250. Available from: http://www.ncbi.nlm.nih.gov/pubmed/29783130
103. Mukhuba M, Roopnarain A, Moeletsi ME, Adeleke R. Metagenomic insights into the microbial community and biogas production pattern during anaerobic digestion of cow dung and mixed food waste [Internet]. Vol. 95, Journal of Chemical Technology & Biotechnology. Wiley; 2019 [cited 2019 Oct 21]. p. 15162. Available from: https://api.wiley.com/onlinelibrary/tdm/v1/articles/10.1002/jctb.6217
104. Blais MA, Matveev A, Lovejoy C, Vincent WF. Size-Fractionated Microbiome Structure in Subarctic Rivers and a Coastal Plume Across DOC and Salinity Gradients. [Internet]. Vol. 12, Frontiers in Microbiology. Frontiers Media S.A.; 2021 [cited 2021 Jan 1]. Available from: http://www.ncbi.nlm.nih.gov/pubmed/35046910
105. Jin W, Cheng Y, Zhu W. The community structure of Methanomassiliicoccales in the rumen of Chinese goats and its response to a high-grain diet. [Internet]. Vol. 8, Journal of Animal Science and Biotechnology. Springer Nature; 2017 [cited 2017 Jan 1]. Available from: http://www.ncbi.nlm.nih.gov/pubmed/28572975
106. Kelly WJ, Li D, Lambie SC, Jeyanathan J, Cox F, Li Y, et al. Complete Genome Sequence of Methanogenic Archaeon ISO4-G1, a Member of the Methanomassiliicoccales, Isolated from a Sheep Rumen. [Internet]. Vol. 4, Genome Announcements. American Society for Microbiology; 2016 [cited 2016 Apr 7]. Available from: http://www.ncbi.nlm.nih.gov/pubmed/27056226

## Sheet: (B)_ Archaea_taxa>0.5%
Supplementary Table 2 (B) Table listing the roles and relative abundances of archeal taxa. The archaeal members with a relative abundance of more than 0.5% are included in the analysis. The roles of the taxa in the methanogenesis process is also indicated.
Phylum	Genus		Relative Abundance (%)					Roles	Role of Genera in AD	References
		CD_E(C2)Tx_SP	CD_E(C2)Tx_EP	CD_E(C2)Utx_SP	CD_E(C2)Utx_EP	CD_NC_SP	CD_NC_EP
Crenarchaeota	Bathyarchaeia	1.18	1.06	0	0.55	0.55	0	Methylotrophic	The Bathyarchaeia group has been divided into up to 23 subgroups using 16S rRNA gene phylogenies. Their extensive presence and frequent domination in natural anaerobic microbial communities are most likely due to their propensity to break down a wide range of organic substrates, such as extracellular glucose, lignin, aromatic molecules, detrital proteins, and aromatic compounds. The genes require…	[93]
Euryarchaeota	Methanobacterium	2.68	3.64	0	2.85	1.48	0	Hydrogenotrophic/Methylotrophic methanogen	Methanobacterium is a type of hydrogenotrophic/methylotrophic methanogen, an H2 scavenger that interacts with fumarate-reducing and H2-producing cellulolytic bacteria through metabolic symbiosis. Higher CO2 production during the anoxic phase promotes Methanobacterium spp. to produce CH4 through the hydrogenotrophic pathway, which enables CO2 to be reduced with H2 during the anoxic phase. In order…	[5],[94],[95]
	Methanothermobacter	0	0	0	0	0.58	0	Hydrogenotrophic/Methylotrophic methanogen	Methanothermobacter is a hydrogenotrophic/methylotrophic methanogen has been found to be actively involved in formation of CH4 under thermophilic conditions. These hydrogenotrophic methanogens use H2 and acetic acid or other methyl-containing compounds to reduce CO2 to CH4.	[96]
	Methanobrevibacter	0	0	0.61	0	0	0	Hydrogenotrophic/Methylotrophic methanogen	Methanobrevibacter is a hydrogenotrophic/methylotrophic methanogen that reduces methanol to CH4 using CO2 as a source of energy. Several genera, including Methanobacterium, Methanobrevibacter, and Methanosphaera, are members of the extensive Methanobacteriaceae family. Instead of using formate as an energy source, they are dependent on CO2 and H2.	[5]
Halobacterota	Methanosarcina	0.38	0.73	0	1.24	2.88	1.26	Hydrogenotrophic/ Acetoclastic/ Mixotrophic methanogen	Methanosarcina is a hydrogenotrophic/mixotrophic and acetoclastic methanogen, found to be actively involved in formation of CH4 under thermophilic conditions. These hydrogenotrophic methanogens use H2 and acetic acid or other methyl-containing compounds to reduce CO2 to CH4. M. thermophila is a typical anaerobic digester representative, demonstrates that methanogenesis occurred mostly through ace…	[5],[97]–[101]
	o_Methanomicrobiales_uncultured	0.64	0.59	0	1.44	0	0	Hydrogenotrophic/Methylotrophic methanogen	Members of order Methanomicrobiales (e.g. Methanoculleus sp. and Methanospirillum sp.) play a significant role in the second stage CH4 production from CO2, H2 and acetic acid. Members of this group are hydrogenotrophic/methylotrophic in nature.	[102]
	Methanosaeta	0	0	2.41	0	2.64	2.29	Acetoclastic methanogen	Methanosaeta is well-known methanogen that specialises in producing CH4 through acetate cleavage via acetoclastic pathway. For the growth, Methanosaeta needs acetate concentrations as low as 0.3 mg L-1 and no higher than 140.6 mg L-1.	[97],[98],[100]
	Methanospirillum	0	0	0	0	0	1.75	Hydrogenotrophic methanogens	Methanospirillum, an obligate anerobic archaea under mesophilic condtions and plays major role in CH4 production from CO2, H2, and acetate through hydrogenotrophic pathway.	[103]
Nanoarchaeota	SCGC_AAA011-D5	0	0	0	1.64	0	0	Syntrophic methanogen	The Methanomassiliicocales in rumen methano-genesis, but their exact role remains to be established.Interestingly, increasing evidence shows that the Metha-nomassiliicoccales do not possess the genes required forthe first six steps of hydrogenotrophic methanogenesis[7]. Instead, methane is produced by via the hydrogen-mediated reduction of methyl-group-containing com-pounds (e.g., methylamines an…	[104]
Thermoplasmatota	f__Methanomassiliicoccaceae_uncultured	0.99	0.62	0	0.83	0	0	Methylotrophic methanogens	Methanomassiliicocales are involved in rumen methanogenesis, but it is unclear exactly what their function is. The Methanomassiliicoccales, it turns out, lack the genes necessary for the first six stages of hydrogenotrophic methanogenesis, according to increasing evidence. Instead, CH4 is produced through the hydrogen-mediated reduction of compounds that contain methyl groups (e.g., methylamines …	[105],[106]
	Methanomassiliicoccus	0.8	0	0	0.95	0	0	Methylotrophic methanogens	Methanomassiliicoccus is a methylotrophic methanogen, and capable of converting methyl group substrate (methanol, methylamine and dimethylamine) with H2 to CH4 under optimal growth conditions at 37 °C.	[95]
