# Supplementary material for: Production of biohythane from cow dung using novel microbial synthetic consortia designed by heat-treated and acclimatized combined wastes
Source: Royal Society of Chemistry journal article supplement (doi:10.1039/d4va00107a), 2024-01-01
Supplement: d4va00107a3.pdf [file d4va00107a3.pdf]

# **"Production of biohythane from cow dung using novel microbial synthetic consortia designed by heat-treated and acclimatized combined wastes."**

Rashmi Ira<sup>1</sup>, Vikas Sharma<sup>1</sup>, Shrawan Kumar<sup>1</sup>, Mira Koul<sup>1</sup>, Lalita Sharma<sup>2</sup>, Aditi Halder<sup>2</sup>,  
Tulika Prakash<sup>1\*</sup>

<sup>1</sup> School of Biosciences and Bioengineering, Indian Institute of Technology, Mandi, Kamand, Mandi, Himachal Pradesh- 175005, India.

<sup>2</sup> School of Chemical Sciences, Indian Institute of Technology, Mandi, Kamand, Mandi, Himachal Pradesh- 175005, India.

\* Correspondence:

Prof. Tulika Prakash

Email ID: [tulika@iitmandi.ac.in](mailto:tulika@iitmandi.ac.in)

Tel.: +91-1905-267140

ORCID ID: 0000-0001-9270-8775

**Journal:** Environmental Science: Advances

**Supplementary Figures**

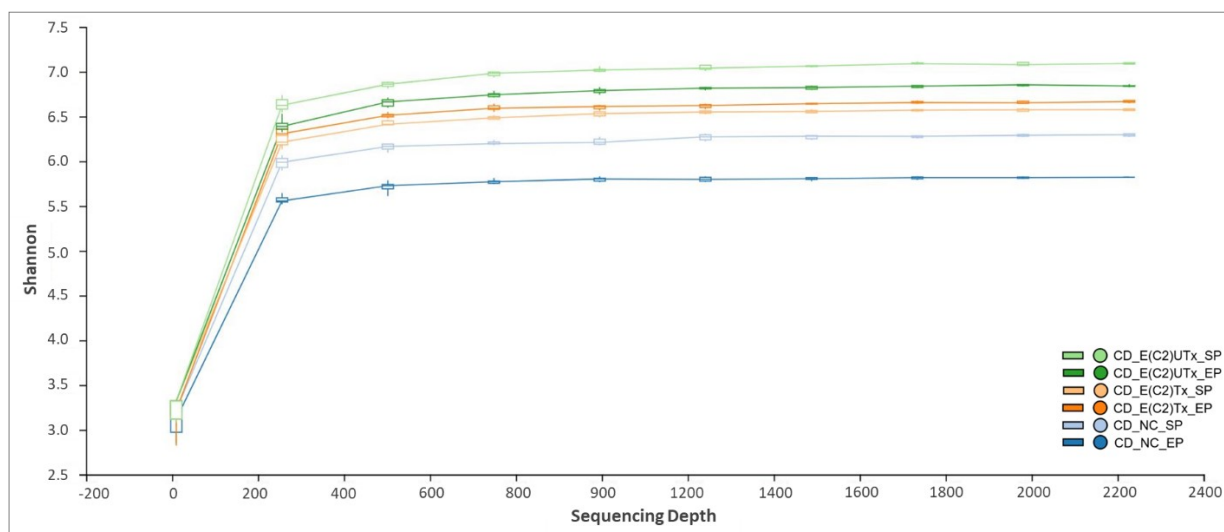

**Figure S1.** Figure representing the rarefaction plots for all the samples based on the Shannon index.

| Samples / Methanogenic community | CD_E(C2)Tx_SP | CD_E(C2)Tx_EP | CD_E(C2)Utx_SP | CD_E(C2)Utx_EP | CD_NC_SP | CD_NC_EP |
|----------------------------------|---------------|---------------|----------------|----------------|----------|----------|
| Acetoclastic                     | 0.38          | 0.73          | 2.41           | 1.24           | 5.52     | 3.55     |
| Hydrogenotrophic                 | 3.7           | 4.96          | 0.61           | 5.53           | 4.94     | 3.01     |
| Methylotrophic                   | 6.29          | 5.91          | 0.61           | 6.62           | 2.61     | 0        |

**Figure S2.** Figure representing the percentages of total relative abundance of different types of methanogens.
